# Supplementary material for: The Interplay of manganese and nitrate in hydroxyapatite nanoparticles as revealed by pulsed EPR and DFT
Source: Royal Society of Chemistry journal article supplement (doi:10.1039/c5cp01986a), 2015-01-01
Supplement: c5cp01986a1.pdf [file c5cp01986a1.pdf]

## Electronic supplementary information

For

Case Study of the Interplay of Manganese and Nitrate in Hydroxyapatite Nanoparticles:  
Association of Oppositely Charged Impurities as Revealed by Pulsed EPR and DFT

Marat Gafurov<sup>a</sup>, †, Timur Biktagirov<sup>a</sup>, Georgy Mamin<sup>a</sup>, Elena Klimashina<sup>b</sup>,  
Valery Putlayev<sup>b</sup>, L. Kuznetsova<sup>c</sup>, Sergei Orlinskii<sup>a</sup>

a) Kazan Federal University, Institute of Physics, 420008 Kazan, Russian Federation.

b) Lomonosov Moscow State University, Faculty of Material Science, 119992 Moscow, Russian  
Federation.

c) Kazan State University for Architecture and Civil Engineering, 420043 Kazan, Russian Federation.

\* Corresponding author: marat.gafurov@kpfu.ru

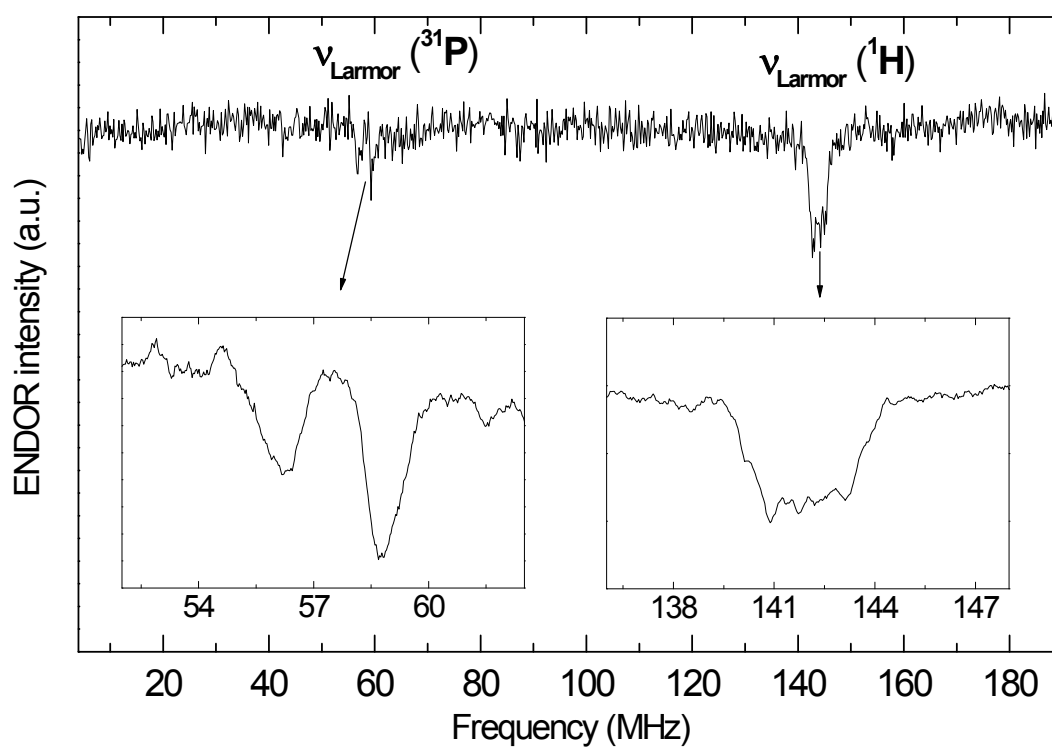

**Fig. S1.** ENDOR spectra of Mn-HAp at 94.0 GHz (W-band) detected by the Mims pulse sequence. The insets show the details of ENDOR spectra near to Larmor frequencies of  $^{31}\text{P}$  and  $^1\text{H}$  in the magnetic field of 3382 mT; radiofrequency pulse length = 18  $\mu\text{s}$ ;  
 $T = 17.5\text{ K}$ .
